# Supplementary material for: Indoxyl Sulfate Elevated Lnc-SLC15A1-1 Upregulating CXCL10/CXCL8 Expression in High-Glucose Endothelial Cells by Sponging MicroRNAs
Source: MDPI journal article supplement (doi:10.3390/toxins13120873), 2021-12-07
Supplement: s1 [file s1]

## Supplement

# Indoxyl Sulfate Elevated *Lnc-SLC15A1-1* Up-regulating CXCL10/CXCL8 Expression in High Glucose Endothelial Cells by Sponging MicroRNAs

**Table S1. Primers of lncRNAs.**

| Transcript ID          | Primer sequence 1        | Primer sequence 2        | Primer sequence 3       |
|------------------------|--------------------------|--------------------------|-------------------------|
| <b><i>NONHSAT</i></b>  | F- CCTCTTGCCCTGTTGAGAGC  | F- GTCCCGCTCCACTTCATAACT |                         |
| <b><i>238235.1</i></b> | R- TCCTTTCGGGGTTCAGCAAA  | R- GGGTTTTCCACTGCTCCAAC  |                         |
| <b><i>NONHSAT</i></b>  | F- TGTAACCTCTTGGAAGCCCT  | F- TGGAGTTGTGAAGGACAGTGA |                         |
| <b><i>231357.1</i></b> | R- TGGCCCCTGGAAGAACTTG   | R- TGCCCTGGCTAGATTCCAC   |                         |
| <b><i>NONHSAT</i></b>  | F- GCCATACCTTGCAGTGTGCG  | F- GCACACAGCAGGAGAGACAG  |                         |
| <b><i>144427.2</i></b> | R- GAACGGGAGTCTGACCAGGTG | R- TGGGGGTCCTGAGAGTCTTC  |                         |
| <b><i>NONHSAT</i></b>  | F- CACCCGCTTGCTAGTGTCT   | F- GCATTGGGCTAGTGTGAGGT  | F- GGACCTCTGATAAGGCTGGC |
| <b><i>258517.1</i></b> | R- AGCTCTACCCTACACCCAG   | R- AGTGGTGGGTGTCATTCCC   | R- TTTGCTCTGGCTCTTGTTG  |
| <b><i>NONHSAT</i></b>  | F- AGTGTGCGGAGTTGTGTTCA  |                          |                         |
| <b><i>167136.1</i></b> | R- GGGGCTCCAGGCATAAACTC  |                          |                         |

**Table S2. Primers of microarray confirmed mRNAs.**

| Gene                 | Forward primer         | Reverse primer         |
|----------------------|------------------------|------------------------|
| <b><i>CXCL10</i></b> | TCCACGTGTTGAGATCATTGC  | TCTTGATGGCCTTCGATTCTG  |
| <b><i>CXCL8</i></b>  | AAGAAACCACCGGAAGGAAC   | AAATTTGGGGTGGAAGGTT    |
| <b><i>FAT2</i></b>   | CACTCCCGAGATCCAAAGGG   | GGCAGTAGAAGAGAAGCCCG   |
| <b><i>JAM2</i></b>   | GTCTCCTTTGTCTACTATCAAC | GGAGCCACTAATACTTCCAG   |
| <b><i>TXNIP</i></b>  | GCCACACTTACCTTGCCAAT   | TTGGATCCAGGAACGCTAAC   |
| <b><i>ARRDC4</i></b> | TGAAGAGTGGAACGAAGGCG   | AGTGGGCCATTCTCCTATGC   |
| <b><i>IL-6</i></b>   | ACTCACCTCTTCAGAACG     | GGCTTGTTCTCACTACT      |
| <b><i>GAPDH</i></b>  | GTCTCCTCTGACTTCAACAGCG | ACCACCCTGTTGCTGTAGCCAA |

**Table S3. RT stem loop primer sequences.**

| microRNA          | Sequence                                              |
|-------------------|-------------------------------------------------------|
| <b>miR-150-3p</b> | GTTGGCTCTGGTGCAGGGTCCGAGGTATTTCGCACCAGAGCCAACCTGTCCC  |
| <b>miR-27b-5p</b> | GTTGGCTCTGGTGCAGGGTCCGAGGTATTTCGCACCAGAGCCAACG TTCACC |
| <b>miR-297</b>    | GTTGGCTCTGGTGCAGGGTCCGAGGTATTTCGCACCAGAGCCAACCATGCAC  |

**Table S4. Primers of miRNAs.**

| microRNA          | Forward primer            | Reverse primer          |
|-------------------|---------------------------|-------------------------|
| <i>miR-150-3p</i> | AGCTGGTACAGGCCTGG         | GTGCAGGGTCCGAGGT        |
| <i>miR-27b-5p</i> | GCGCAGAGCTTAGCTGATT       | GTGCAGGGTCCGAGGT        |
| <i>miR-297</i>    | GGCGGATGTATGTGTGCAT       | GTGCAGGGTCCGAGGT        |
| <i>U6</i>         | GCTTCGGCAGCACATATACTAAAAT | CGCTTCACGAATTTGCGTGTCAT |

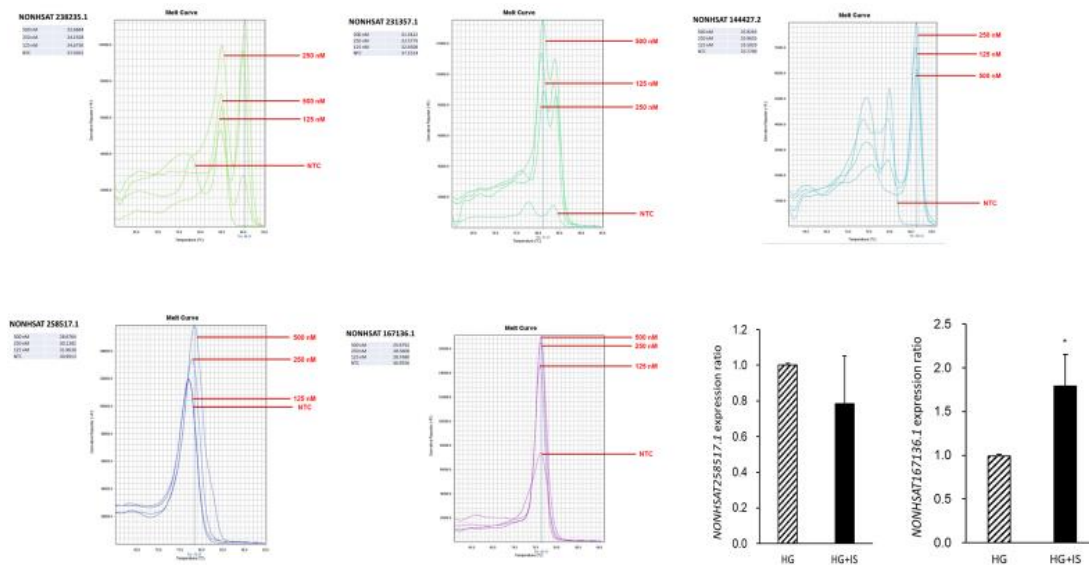

**Figure S1. Primer tests of selected lncRNAs and the results of RT-PCR.**

To assess the designed PCR primers against the input lncRNA sequence to determine if a product other than the desired target can be amplified, a typical denaturation (melt) curve was performed. Designed lncRNA primers with different concentrations were evaluated to determine which one could give rise to a single distinct peak in the plot of the negative derivative of fluorescence vs. temperature. The qualified designed lncRNA primers were used to perform the RT-PCR in the condition of HUVECs explored on HG and HG+IS. lncRNA of NONHSAT167136.1 expression was significantly ( $p < 0.05$ ) increased in HUVECs in HG+IS treatment by using the designed primer in RT-PCR experiment.

(A1) Four repeats of IP-10 western blot experiments

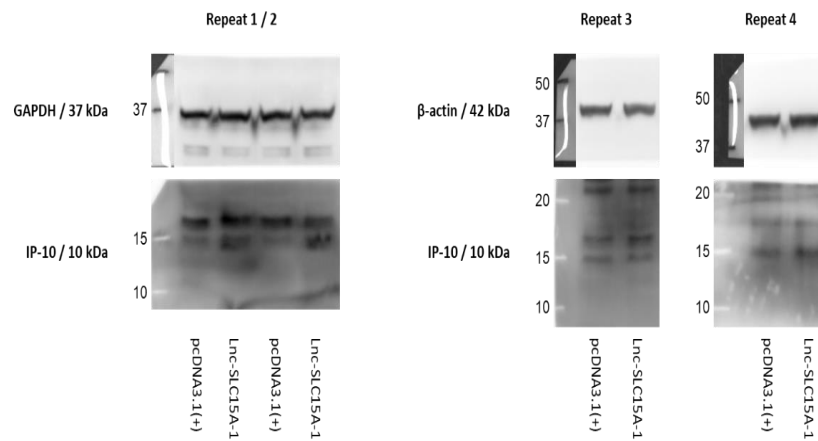

(A2) Four repeats of IL-8 western blot experiments.

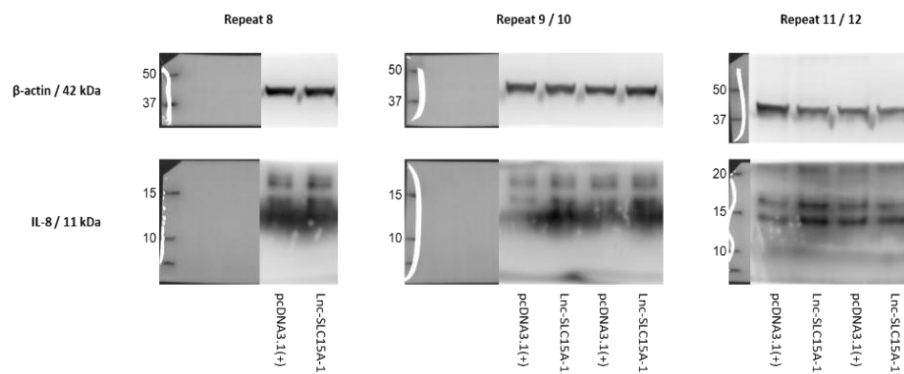

**Figure S2. Original western blot gel of IP-10 and IL-8.**
